# Supplementary material for: Niche diversification of Mediterranean and southwestern Asian tortoises
Source: PeerJ. 2022 Jul 11;10:e13702. doi: 10.7717/peerj.13702 (PMC9281595; doi:10.7717/peerj.13702)
Supplement: Appendix S1 — The thinned records represent the spatially independent coordinates +10 km. [file peerj-10-13702-s001.xls]

## Sheet: Sheet1
Taxa		Latitude	Longitude
Testudo graeca armeniaca	Azerbaijan	40.8218	49.4865
Testudo graeca armeniaca	Iran	38.8333	44.85
Testudo graeca armeniaca	Armenia	38.8994	46.2771
Testudo graeca armeniaca	Armenia	39.8935	44.7118
Testudo graeca armeniaca	Armenia	39.8904	44.762
Testudo graeca armeniaca	Armenia	39.8904	44.762
Testudo graeca armeniaca	Armenia	39.9423	44.7019
Testudo graeca armeniaca	Azerbaijan	39.1637	46.8728
Testudo graeca armeniaca	Azerbaijan	39.6641	47.1652
Testudo graeca armeniaca	Armenia	40.4051	44.5378
Testudo graeca armeniaca	Russia	43.0089	47.2325
Testudo graeca buxtoni	Iran	32.5503	55.2215
Testudo graeca buxtoni	Iran	34.8333	46.55
Testudo graeca buxtoni	Iran	34.5843	46.8917
Testudo graeca buxtoni	Iran	34.5667	46.9
Testudo graeca buxtoni	Iran	34.2667	46.2667
Testudo graeca buxtoni	Iran	34.25	46.7667
Testudo graeca buxtoni	Iran	29.9193	53.2977
Testudo graeca buxtoni	Iran	32.5004	54.4336
Testudo graeca buxtoni	Iran	33.6667	46.5667
Testudo graeca buxtoni	Iran	30.2518	53.2251
Testudo graeca buxtoni	Iran	34.7667	47.2333
Testudo graeca buxtoni	Iran	34.6167	47.5167
Testudo graeca buxtoni	Iran	33.6667	49.8667
Testudo graeca buxtoni	Iran	32.9167	52.6333
Testudo graeca buxtoni	Iran	32.8	52.4167
Testudo graeca buxtoni	Iran	30.2007	51.9865
Testudo graeca buxtoni	Iran	35.8827	47.0197
Testudo graeca buxtoni	Iran	32.35	50.3667
Testudo graeca buxtoni	Iran	31.5012	54.1387
Testudo graeca buxtoni	Iran	37.3167	45.25
Testudo graeca buxtoni	Iran	36.7001	48.2902
Testudo graeca buxtoni	Iran	37.5407	46.1601
Testudo graeca buxtoni	Iran	37.22	48.08
Testudo graeca buxtoni	Iran	36.57	49.33
Testudo graeca buxtoni	Iran	38.2009	45.4561
Testudo graeca buxtoni	Iran	38.8757	45.6322
Testudo graeca buxtoni	Iran	36.7392	49.4295
Testudo graeca buxtoni	Iran	36.7356	49.4182
Testudo graeca buxtoni	Iran	38.4	46.8667
Testudo graeca buxtoni	Iran	38.26	47.42
Testudo graeca buxtoni	Iran	38.3833	47.9167
Testudo graeca buxtoni	Iran	38.8839	48.0128
Testudo graeca buxtoni	Iran	38.7667	46.8667
Testudo graeca cyrenaica	Libya	32.5996	21.4779
Testudo graeca cyrenaica	Libya	32.2873	21.0699
Testudo graeca cyrenaica	Libya	32.651	21.7935
Testudo graeca graeca	Morocco	29.6764	-9.8483
Testudo graeca graeca	Morocco	29.8508	-9.78266
Testudo graeca graeca	Morocco	29.8906	-9.51214
Testudo graeca graeca	Morocco	30.3219	-9.56366
Testudo graeca graeca	Morocco	30.3633	-9.58647
Testudo graeca graeca	Morocco	30.4407	-8.9954
Testudo graeca graeca	Morocco	31.3339	-9.78786
Testudo graeca graeca	Morocco	31.3352	-9.79421
Testudo graeca graeca	Morocco	31.9307	-9.39174
Testudo graeca graeca	Morocco	30.0858	-9.66425
Testudo graeca graeca	Morocco	30.0859	-9.66428
Testudo graeca graeca	Morocco	30.0927	-9.65414
Testudo graeca graeca	Morocco	30.2705	-9.61563
Testudo graeca graeca	Morocco	30.3574	-9.59945
Testudo graeca graeca	Morocco	30.3678	-9.59921
Testudo graeca graeca	Morocco	30.806	-9.77106
Testudo graeca graeca	Morocco	31.5093	-9.6969
Testudo graeca graeca	Morocco	31.5211	-9.62972
Testudo graeca graeca	Morocco	31.5211	-9.62972
Testudo graeca graeca	Morocco	29.356	-9.95419
Testudo graeca graeca	Morocco	30.3686	-9.09373
Testudo graeca graeca	Morocco	29.5823	-9.41507
Testudo graeca graeca	Morocco	29.992	-9.22301
Testudo graeca graeca	Morocco	30.5293	-8.5346
Testudo graeca graeca	Morocco	30.532	-8.73664
Testudo graeca graeca	Morocco	31.1544	-9.70718
Testudo graeca graeca	Morocco	30.3809	-8.69969
Testudo graeca graeca	Morocco	30.3851	-8.69874
Testudo graeca graeca	Morocco	31.591	-9.25917
Testudo graeca graeca	Morocco	31.7572	-7.9745
Testudo graeca graeca	Morocco	30.7183	-8.43287
Testudo graeca graeca	Morocco	31.611	-7.50036
Testudo graeca graeca	Morocco	30.6158	-8.12572
Testudo graeca graeca	Morocco	31.8853	-7.94655
Testudo graeca graeca	Morocco	31.5575	-7.68047
Testudo graeca graeca	Morocco	31.5599	-7.67541
Testudo graeca graeca	Morocco	30.6207	-8.08272
Testudo graeca graeca	Morocco	30.7664	-8.37893
Testudo graeca graeca	Morocco	31.6566	-7.25456
Testudo graeca graeca	Morocco	31.4429	-7.77765
Testudo graeca graeca	Morocco	31.5364	-7.55568
Testudo graeca graeca	Morocco	31.3927	-7.82604
Testudo graeca graeca	Morocco	31.5356	-7.49658
Testudo graeca graeca	Morocco	31.5293	-7.48373
Testudo graeca graeca	Morocco	31.4268	-7.41069
Testudo graeca graeca	Morocco	31.7242	-6.9719
Testudo graeca graeca	Morocco	31.2496	-7.97062
Testudo graeca graeca	Morocco	31.2469	-8.01246
Testudo graeca graeca	Morocco	31.2937	-7.99439
Testudo graeca ibera	Greece	37.6684	26.8744
Testudo graeca ibera	Greece	36.7697	27.0503
Testudo graeca ibera	Greece	37.7307	26.9189
Testudo graeca ibera	Greece	37.7182	26.9413
Testudo graeca ibera	Greece	37.7006	26.9263
Testudo graeca ibera	Greece	37.6813	26.8476
Testudo graeca ibera	Greece	37.6812	26.8418
Testudo graeca ibera	Greece	37.6791	26.8495
Testudo graeca ibera	Greece	37.7002	26.9378
Testudo graeca ibera	Greece	36.8452	27.1871
Testudo graeca ibera	Greece	36.8452	27.1875
Testudo graeca ibera	Turkey	37.6924	27.159
Testudo graeca ibera	Greece	36.8496	27.3207
Testudo graeca ibera	Greece	36.8752	27.3318
Testudo graeca ibera	Greece	36.8374	27.187
Testudo graeca ibera	Greece	36.5581	27.8583
Testudo graeca ibera	Greece	36.5561	27.8567
Testudo graeca ibera	Turkey	38.4159	26.7241
Testudo graeca ibera	Turkey	37.5306	27.2758
Testudo graeca ibera	Greece	36.5481	27.8566
Testudo graeca ibera	Greece	36.5462	27.8572
Testudo graeca ibera	Greece	36.5428	27.8498
Testudo graeca ibera	Turkey	37.0641	27.2922
Testudo graeca ibera	Greece	36.8494	27.2129
Testudo graeca ibera	Greece	36.6192	27.8517
Testudo graeca ibera	Greece	36.6187	27.8528
Testudo graeca ibera	Greece	36.6184	27.8513
Testudo graeca ibera	Greece	36.616	27.8444
Testudo graeca ibera	Greece	36.6083	27.8463
Testudo graeca ibera	Greece	36.6014	27.8458
Testudo graeca ibera	Greece	39.0329	26.5358
Testudo graeca ibera	Greece	39.0202	26.5576
Testudo graeca ibera	Turkey	38.6574	26.7618
Testudo graeca ibera	Turkey	37.9477	27.2798
Testudo graeca ibera	Turkey	36.6656	28.0998
Testudo graeca ibera	Turkey	37.5319	27.4221
Testudo graeca ibera	Greece	39.1504	26.2782
Testudo graeca ibera	Greece	39.123	26.4203
Testudo graeca ibera	Greece	39.0957	26.1783
Testudo graeca ibera	Greece	39.2134	25.8548
Testudo graeca ibera	Greece	39.2119	26.2424
Testudo graeca ibera	Greece	39.2117	26.2435
Testudo graeca ibera	Greece	39.2047	25.8546
Testudo graeca ibera	Greece	39.2032	26.2192
Testudo graeca ibera	Greece	39.1575	26.1353
Testudo graeca ibera	Greece	39.1489	26.2836
Testudo graeca ibera	Greece	39.1479	26.2857
Testudo graeca ibera	Greece	39.1123	26.0905
Testudo graeca ibera	Turkey	37.5948	27.4502
Testudo graeca ibera	Turkey	37.5087	27.5191
Testudo graeca ibera	Greece	39.3012	26.1477
Testudo graeca ibera	Greece	39.2716	25.984
Testudo graeca ibera	Greece	39.2421	25.8628
Testudo graeca ibera	Greece	39.235	25.8672
Testudo graeca ibera	Greece	39.2153	26.2233
Testudo graeca ibera	Greece	39.1608	25.9481
Testudo graeca ibera	Greece	37.7315	26.8339
Testudo graeca ibera	Greece	37.5254	23.4836
Testudo graeca ibera	Greece	39.3246	26.1782
Testudo graeca ibera	Greece	39.3201	26.1826
Testudo graeca ibera	Greece	39.2483	26.2092
Testudo graeca ibera	Greece	39.2416	26.225
Testudo graeca ibera	Greece	39.2309	26.1905
Testudo graeca ibera	Greece	39.2294	26.1798
Testudo graeca ibera	Greece	39.2161	26.1748
Testudo graeca ibera	Greece	39.1804	25.8881
Testudo graeca ibera	Greece	39.1758	25.8858
Testudo graeca ibera	Greece	39.1736	25.885
Testudo graeca ibera	Greece	39.1684	25.9245
Testudo graeca ibera	Greece	37.262	23.1441
Testudo graeca ibera	Greece	39.3854	26.3361
Testudo graeca ibera	Greece	39.3676	26.3034
Testudo graeca ibera	Greece	39.2714	26.2961
Testudo graeca ibera	Greece	39.2671	26.2901
Testudo graeca ibera	Greece	39.3795	26.2262
Testudo graeca ibera	Greece	39.3784	26.2193
Testudo graeca ibera	Greece	39.3782	26.218
Testudo graeca ibera	Greece	39.3471	26.1982
Testudo graeca ibera	Greece	39.347	26.1954
Testudo graeca ibera	Greece	39.2641	26.2122
Testudo graeca ibera	Greece	39.2482	26.1731
Testudo graeca ibera	Greece	39.2447	26.187
Testudo graeca ibera	Greece	38.9954	26.3568
Testudo graeca ibera	Turkey	37.8958	27.3917
Testudo graeca ibera	Greece	39.3666	26.2093
Testudo graeca ibera	Greece	39.3482	26.1778
Testudo graeca ibera	Greece	39.3441	26.1817
Testudo graeca ibera	Greece	39.2924	26.1799
Testudo graeca ibera	Greece	39.2583	26.1198
Testudo graeca ibera	Greece	39.2228	25.8758
Testudo graeca ibera	Greece	39.2226	25.8758
Testudo graeca ibera	Greece	39.209	25.8986
Testudo graeca ibera	Greece	39.3458	26.2145
Testudo graeca ibera	Greece	39.3212	26.3584
Testudo graeca ibera	Greece	39.2949	26.1992
Testudo graeca ibera	Greece	39.2525	26.1707
Testudo graeca ibera	Greece	39.228	25.9601
Testudo graeca ibera	Greece	39.2167	25.905
Testudo graeca ibera	Greece	39.0959	26.3351
Testudo graeca ibera	Greece	39.3038	26.1723
Testudo graeca ibera	Greece	39.2714	26.097
Testudo graeca ibera	Greece	39.2714	26.097
Testudo graeca ibera	Greece	39.2593	26.1396
Testudo graeca ibera	Greece	39.3032	26.316
Testudo graeca ibera	Greece	39.2589	26.1176
Testudo graeca ibera	Greece	39.2314	25.9377
Testudo graeca ibera	Greece	39.2311	25.936
Testudo graeca ibera	Greece	39.0885	26.3682
Testudo graeca ibera	Greece	39.3626	26.2847
Testudo graeca ibera	Greece	39.3077	26.3194
Testudo graeca ibera	Greece	39.1781	26.046
Testudo graeca ibera	Greece	39.0227	26.3756
Testudo graeca ibera	Greece	39.3559	26.2424
Testudo graeca ibera	Greece	39.3572	26.2762
Testudo graeca ibera	Turkey	37.4185	27.8193
Testudo graeca ibera	Turkey	37.5321	28.181
Testudo graeca ibera	Turkey	40.1399	38.9779
Testudo graeca ibera	Turkey	38.2606	35.1166
Testudo graeca ibera	Greece	40.3931	22.9144
Testudo graeca ibera	Turkey	40.4408	32.6163
Testudo graeca ibera	Romania	44.4401	28.7625
Testudo graeca ibera	Romania	44.0896	28.6415
Testudo graeca ibera	Romania	44.0878	28.6412
Testudo graeca ibera	Romania	44.4379	28.775
Testudo graeca ibera	Romania	44.4345	28.7684
Testudo graeca ibera	Romania	44.5516	28.7641
Testudo graeca ibera	Romania	44.5458	28.7709
Testudo graeca ibera	Romania	44.3817	28.7095
Testudo graeca ibera	Bulgaria	43.4206	28.505
Testudo graeca ibera	Bulgaria	43.4134	28.4893
Testudo graeca ibera	Romania	44.3762	28.7067
Testudo graeca ibera	Romania	44.8827	28.8347
Testudo graeca ibera	Romania	43.7895	28.3551
Testudo graeca ibera	Romania	43.773	28.3698
Testudo graeca ibera	Romania	43.773	28.3695
Testudo graeca ibera	Romania	43.8214	28.3712
Testudo graeca ibera	Serbia	42.1475	21.2992
Testudo graeca ibera	Romania	44.9051	28.7338
Testudo graeca ibera	Romania	44.8152	28.6991
Testudo graeca ibera	Romania	44.8228	28.6864
Testudo graeca ibera	Romania	44.8211	28.6921
Testudo graeca ibera	Romania	44.8206	28.6922
Testudo graeca ibera	Romania	44.7875	28.654
Testudo graeca ibera	Romania	44.2855	28.0079
Testudo graeca ibera	Bulgaria	43.6527	28.1215
Testudo graeca ibera	Romania	44.7819	28.6575
Testudo graeca ibera	Romania	44.193	27.8586
Testudo graeca ibera	Romania	44.7628	28.6643
Testudo graeca ibera	Romania	45.1893	28.6173
Testudo graeca ibera	Romania	44.1196	27.8127
Testudo graeca ibera	Romania	44.0548	27.6405
Testudo graeca ibera	Serbia	42.3157	21.8811
Testudo graeca ibera	Serbia	42.3128	21.8796
Testudo graeca ibera	Serbia	42.3124	21.8727
Testudo graeca ibera	Serbia	42.311	21.8738
Testudo graeca ibera	Serbia	42.3104	21.8763
Testudo graeca ibera	Romania	45.1888	28.575
Testudo graeca ibera	Serbia	42.3117	21.8357
Testudo graeca ibera	Serbia	42.3267	21.8933
Testudo graeca ibera	Serbia	42.2721	21.6524
Testudo graeca ibera	Serbia	42.2521	21.6582
Testudo graeca ibera	Serbia	42.3313	21.8341
Testudo graeca ibera	Serbia	42.3199	21.8713
Testudo graeca ibera	Serbia	42.2737	21.6497
Testudo graeca ibera	Russia	44.7494	37.6075
Testudo graeca ibera	Armenia	40.9135	45.4281
Testudo graeca ibera	Romania	45.1838	28.3814
Testudo graeca ibera	Romania	45.1818	28.2623
Testudo graeca ibera	Romania	45.2414	28.1879
Testudo graeca ibera	Georgia	41.2757	45.8888
Testudo graeca ibera	Romania	45.244	28.1911
Testudo graeca ibera	Romania	45.2438	28.1912
Testudo graeca ibera	Romania	45.2153	28.2029
Testudo graeca ibera	Romania	45.2056	28.2482
Testudo graeca ibera	Romania	45.2056	28.2482
Testudo graeca ibera	Georgia	41.2766	45.8945
Testudo graeca ibera	Romania	45.1918	28.2567
Testudo graeca ibera	Georgia	41.1727	46.3918
Testudo graeca ibera	Romania	45.248	28.1925
Testudo graeca ibera	Romania	45.2456	28.1969
Testudo graeca ibera	Romania	45.2449	28.1934
Testudo graeca ibera	Romania	45.2448	28.1929
Testudo graeca ibera	Georgia	41.4501	45.2131
Testudo graeca ibera	Romania	45.2544	28.19
Testudo graeca ibera	Georgia	41.2778	45.9007
Testudo graeca ibera	Georgia	41.2775	45.9074
Testudo graeca ibera	Georgia	41.4031	44.5215
Testudo graeca ibera	Georgia	41.2723	45.8745
Testudo graeca ibera	Georgia	41.241	45.9464
Testudo graeca ibera	Georgia	41.2784	45.8611
Testudo graeca ibera	Georgia	41.275	45.9171
Testudo graeca ibera	Georgia	41.2666	45.8127
Testudo graeca ibera	Georgia	41.2436	45.841
Testudo graeca ibera	Georgia	41.2434	45.8413
Testudo graeca ibera	Georgia	41.2279	46.3513
Testudo graeca ibera	Georgia	41.2798	45.8352
Testudo graeca ibera	Georgia	41.2737	45.9384
Testudo graeca ibera	Georgia	41.2736	45.9377
Testudo graeca ibera	Georgia	41.1898	46.5088
Testudo graeca ibera	Georgia	41.281	45.9706
Testudo graeca ibera	Georgia	41.2782	45.9641
Testudo graeca ibera	Georgia	41.274	45.942
Testudo graeca ibera	Georgia	41.2332	46.3625
Testudo graeca ibera	Georgia	41.2903	45.9866
Testudo graeca ibera	Georgia	41.2898	45.9861
Testudo graeca ibera	Georgia	41.2897	45.9865
Testudo graeca ibera	Georgia	41.2852	45.9811
Testudo graeca ibera	Georgia	41.236	46.3647
Testudo graeca ibera	Georgia	41.2356	46.3646
Testudo graeca ibera	Georgia	41.2976	45.9919
Testudo graeca ibera	Georgia	41.8368	44.7334
Testudo graeca ibera	Georgia	41.4491	45.3765
Testudo graeca ibera	Georgia	41.4478	45.3757
Testudo graeca ibera	Georgia	41.4473	45.3754
Testudo graeca ibera	Georgia	41.4471	45.3759
Testudo graeca ibera	Georgia	41.4432	45.377
Testudo graeca ibera	Georgia	41.238	46.3799
Testudo graeca ibera	Georgia	41.2244	46.4035
Testudo graeca ibera	Georgia	41.2396	46.3878
Testudo graeca ibera	Georgia	41.4766	45.3182
Testudo graeca ibera	Georgia	41.6986	44.7524
Testudo graeca ibera	Georgia	41.3194	46.3401
Testudo graeca ibera	Georgia	41.4788	46.1238
Testudo graeca ibera	Georgia	41.4778	46.1007
Testudo graeca marokkensis	Morocco	33.6277	-7.06435
Testudo graeca marokkensis	Morocco	33.6918	-6.92101
Testudo graeca marokkensis	Morocco	34.2382	-6.68042
Testudo graeca marokkensis	Morocco	33.6468	-6.89834
Testudo graeca marokkensis	Morocco	33.6988	-6.91272
Testudo graeca marokkensis	Morocco	33.8779	-6.61478
Testudo graeca marokkensis	Morocco	34.0149	-6.61228
Testudo graeca marokkensis	Morocco	34.1867	-6.56504
Testudo graeca marokkensis	Morocco	34.2677	-6.12455
Testudo graeca marokkensis	Morocco	34.4152	-6.43198
Testudo graeca marokkensis	Morocco	34.8637	-6.05049
Testudo graeca marokkensis	Morocco	33.4588	-7.60249
Testudo graeca marokkensis	Morocco	33.7157	-6.46846
Testudo graeca marokkensis	Morocco	35.3092	-5.37682
Testudo graeca marokkensis	Morocco	34.0833	-5.3169
Testudo graeca marokkensis	Morocco	34.6508	-5.66067
Testudo graeca marokkensis	Morocco	34.8978	-6.28212
Testudo graeca marokkensis	Morocco	34.9219	-5.80483
Testudo graeca marokkensis	Morocco	33.0704	-7.23205
Testudo graeca marokkensis	Morocco	33.0722	-7.23304
Testudo graeca marokkensis	Morocco	33.6841	-6.23217
Testudo graeca marokkensis	Morocco	34.7683	-5.51616
Testudo graeca marokkensis	Morocco	33.8378	-5.66341
Testudo graeca marokkensis	Morocco	35.4575	-5.42337
Testudo graeca marokkensis	Morocco	33.9616	-4.90505
Testudo graeca marokkensis	Morocco	34.1125	-4.29199
Testudo graeca marokkensis	Morocco	35.5037	-5.77254
Testudo graeca marokkensis	Morocco	33.8237	-5.65865
Testudo graeca marokkensis	Morocco	33.8258	-5.6637
Testudo graeca marokkensis	Morocco	33.8262	-5.64297
Testudo graeca marokkensis	Morocco	33.8283	-5.66203
Testudo graeca marokkensis	Morocco	33.8296	-5.64392
Testudo graeca marokkensis	Morocco	34.1068	-4.96685
Testudo graeca marokkensis	Morocco	35.5652	-5.98927
Testudo graeca marokkensis	Morocco	35.8903	-5.4346
Testudo graeca marokkensis	Morocco	32.5752	-6.03515
Testudo graeca marokkensis	Morocco	33.5475	-6.01101
Testudo graeca marokkensis	Morocco	33.5537	-5.58512
Testudo graeca marokkensis	Morocco	33.5475	-5.58167
Testudo graeca marokkensis	Morocco	33.5883	-5.26051
Testudo graeca marokkensis	Morocco	33.5882	-5.23144
Testudo graeca marokkensis	Morocco	33.6083	-5.27071
Testudo graeca marokkensis	Morocco	33.6604	-5.04857
Testudo graeca marokkensis	Morocco	34.0833	-4.11416
Testudo graeca nabeulensis	Tunisia	33.9003	8.13769
Testudo graeca nabeulensis	Tunisia	34.4611	9.41447
Testudo graeca nabeulensis	Tunisia	35.265	11.0928
Testudo graeca nabeulensis	Tunisia	36.4174	9.22266
Testudo graeca nabeulensis	Sardinia	39.8842	8.43984
Testudo graeca nabeulensis	Tunisia	37.2066	9.52191
Testudo graeca nabeulensis	Sardinia	40.0687	8.48337
Testudo graeca nabeulensis	Sardinia	39.9913	8.30563
Testudo graeca nabeulensis	Tunisia	37.0608	11.0095
Testudo graeca nabeulensis	Tunisia	37.1975	9.35855
Testudo graeca nabeulensis	Tunisia	36.724	10.3213
Testudo graeca nabeulensis	Tunisia	35.1645	8.62385
Testudo graeca nabeulensis	Tunisia	35.7212	10.5273
Testudo graeca nabeulensis	Tunisia	35.9158	10.5449
Testudo graeca nabeulensis	Tunisia	37.5281	8.94572
Testudo graeca nabeulensis	Tunisia	36.4059	10.4246
Testudo graeca nabeulensis	Tunisia	36.6141	10.3469
Testudo graeca nabeulensis	Algeria	36.8488	8.56642
Testudo graeca nabeulensis	Sardinia	40.0869	8.56013
Testudo graeca terrestris	Israel	31.6556	34.9364
Testudo graeca terrestris	Israel	31.6565	34.9332
Testudo graeca terrestris	Israel	31.69	35.0407
Testudo graeca terrestris	Israel	31.7061	35.165
Testudo graeca terrestris	Israel	31.7234	35.0512
Testudo graeca terrestris	Israel	31.7731	35.0902
Testudo graeca terrestris	Israel	31.9507	35.347
Testudo graeca terrestris	Israel	31.9516	35.3576
Testudo graeca terrestris	Israel	32.0021	35.3418
Testudo graeca terrestris	Israel	32.0084	35.3492
Testudo graeca terrestris	Israel	32.6042	35.5131
Testudo graeca terrestris	Israel	32.6114	35.5089
Testudo graeca terrestris	Israel	32.6177	35.5175
Testudo graeca terrestris	Israel	32.6187	35.4706
Testudo graeca terrestris	Israel	32.624	35.5143
Testudo graeca terrestris	Israel	32.6775	35.0976
Testudo graeca terrestris	Israel	32.8729	35.5012
Testudo graeca terrestris	Israel	32.8928	35.4874
Testudo graeca terrestris	Israel	32.8976	35.6905
Testudo graeca terrestris	Israel	32.8992	35.7375
Testudo graeca terrestris	Israel	32.901	35.7408
Testudo graeca terrestris	Israel	32.6162	35.0483
Testudo graeca terrestris	Israel	32.7389	35.1156
Testudo graeca terrestris	Israel	32.9534	35.3411
Testudo graeca terrestris	Israel	32.9705	35.5446
Testudo graeca terrestris	Israel	33.0153	35.5199
Testudo graeca terrestris	Israel	33.0875	35.4934
Testudo graeca terrestris	Israel	33.2458	35.6484
Testudo graeca terrestris	Israel	33.2948	35.7786
Testudo graeca terrestris	Israel	32.8939	35.0866
Testudo graeca terrestris	Israel	33.0761	35.2203
Testudo graeca terrestris	Syria	35.9032	36.5566
Testudo graeca terrestris	Lebanon	34.1827	35.6538
Testudo graeca terrestris	Turkey	36.1513	33.6875
Testudo graeca terrestris	Turkey	36.2945	33.932
Testudo graeca terrestris	Turkey	36.2983	33.9283
Testudo graeca terrestris	Turkey	36.3096	33.9585
Testudo graeca terrestris	Turkey	37.1617	37.1854
Testudo graeca terrestris	Turkey	36.3671	33.978
Testudo graeca terrestris	Turkey	37.1375	37.2058
Testudo graeca terrestris	Turkey	36.032	32.7925
Testudo graeca terrestris	Turkey	36.2411	29.4125
Testudo graeca terrestris	Turkey	36.2685	29.3785
Testudo graeca terrestris	Turkey	36.4626	34.0773
Testudo graeca terrestris	Turkey	36.5507	29.1186
Testudo graeca terrestris	Turkey	36.5775	34.2212
Testudo graeca terrestris	Turkey	36.5572	29.1266
Testudo graeca terrestris	Turkey	36.575	29.0801
Testudo graeca terrestris	Turkey	36.7853	28.6326
Testudo graeca terrestris	Turkey	36.8461	28.6373
Testudo graeca terrestris	Turkey	36.4566	29.2511
Testudo graeca terrestris	Turkey	36.8256	28.6182
Testudo graeca terrestris	Turkey	36.8311	28.6177
Testudo graeca terrestris	Turkey	36.8893	28.6994
Testudo graeca terrestris	Turkey	36.2722	29.3098
Testudo graeca terrestris	Turkey	36.3945	30.4717
Testudo graeca terrestris	Turkey	36.409	30.4734
Testudo graeca terrestris	Turkey	36.2236	29.6571
Testudo graeca terrestris	Turkey	36.8908	28.5809
Testudo graeca terrestris	Turkey	36.9554	28.6964
Testudo graeca terrestris	Turkey	36.5722	29.1117
Testudo graeca terrestris	Turkey	36.9093	28.598
Testudo graeca terrestris	Turkey	36.5273	30.5468
Testudo graeca terrestris	Turkey	36.584	30.5726
Testudo graeca terrestris	Turkey	36.6761	35.0794
Testudo graeca terrestris	Turkey	36.6778	35.0799
Testudo graeca terrestris	Turkey	36.6904	35.0796
Testudo graeca terrestris	Turkey	36.7055	35.0887
Testudo graeca terrestris	Turkey	36.9953	28.635
Testudo graeca terrestris	Turkey	36.2323	29.7465
Testudo graeca terrestris	Turkey	36.5385	31.9934
Testudo graeca terrestris	Turkey	36.7413	29.2048
Testudo graeca terrestris	Turkey	36.5249	29.1522
Testudo graeca terrestris	Turkey	36.8221	28.6192
Testudo graeca terrestris	Turkey	36.824	28.624
Testudo graeca terrestris	Turkey	36.8248	28.621
Testudo graeca terrestris	Turkey	36.8248	28.6229
Testudo graeca terrestris	Turkey	36.8248	28.6227
Testudo graeca terrestris	Turkey	36.8249	28.6197
Testudo graeca terrestris	Turkey	37.0523	28.3165
Testudo graeca terrestris	Turkey	36.5814	33.9261
Testudo graeca terrestris	Turkey	36.7254	31.5715
Testudo graeca terrestris	Turkey	36.7917	33.3525
Testudo graeca terrestris	Turkey	36.8561	30.8338
Testudo graeca terrestris	Turkey	36.9394	31.1692
Testudo graeca terrestris	Turkey	36.8434	31.5088
Testudo graeca terrestris	Turkey	36.8895	31.5315
Testudo graeca terrestris	Turkey	36.9235	31.4562
Testudo graeca terrestris	Turkey	36.942	31.1704
Testudo graeca terrestris	Turkey	36.5452	30.4997
Testudo graeca terrestris	Turkey	36.8783	31.5477
Testudo graeca terrestris	Turkey	38.6357	42.2393
Testudo graeca terrestris	Turkey	38.742	42.4581
Testudo graeca terrestris	Turkey	38.8745	43.5039
Testudo graeca terrestris	Turkey	38.9162	43.5488
Testudo graeca terrestris	Turkey	38.7011	43.523
Testudo graeca terrestris	Turkey	38.9383	43.6552
Testudo graeca terrestris	Turkey	37.0189	31.8594
Testudo graeca terrestris	Turkey	38.9084	43.0031
Testudo graeca terrestris	Turkey	37.1995	32.1375
Testudo graeca terrestris	Turkey	37.5596	31.5327
Testudo graeca terrestris	Turkey	38.6659	42.3005
Testudo graeca whitei	Morocco	35.3027	-3.03445
Testudo graeca whitei	Morocco	35.0723	-3.8287
Testudo graeca whitei	Morocco	35.3476	-2.99453
Testudo graeca whitei	Morocco	34.9054	-2.66985
Testudo graeca whitei	Algeria	35.7499	-0.142077
Testudo graeca whitei	Morocco	35.12	-2.34069
Testudo graeca whitei	Morocco	35.1232	-2.36153
Testudo graeca whitei	Morocco	35.1299	-2.3937
Testudo graeca whitei	Morocco	35.1305	-2.39299
Testudo graeca whitei	Spain	36.9779	-6.44504
Testudo graeca whitei	Spain	36.9955	-6.4476
Testudo graeca whitei	Spain	36.9987	-6.44718
Testudo graeca whitei	Morocco	34.8384	-2.35655
Testudo graeca whitei	Morocco	34.8568	-2.42547
Testudo graeca whitei	Spain	36.9802	-6.43984
Testudo graeca whitei	Spain	37.0205	-6.44772
Testudo graeca whitei	Spain	37.1353	-1.93306
Testudo graeca whitei	Spain	37.1881	-1.90589
Testudo graeca whitei	Morocco	34.8565	-2.35573
Testudo graeca whitei	Morocco	34.8801	-2.34951
Testudo graeca whitei	Morocco	35.074	-2.40618
Testudo graeca whitei	Morocco	33.3552	-2.77812
Testudo graeca whitei	Morocco	33.3948	-2.83429
Testudo graeca whitei	Spain	37.1034	-1.93954
Testudo graeca whitei	Spain	37.3618	-1.81227
Testudo graeca whitei	Algeria	36.2734	1.41458
Testudo graeca whitei	Morocco	34.023	-2.60594
Testudo graeca whitei	Morocco	34.7927	-2.43866
Testudo graeca whitei	Morocco	33.6178	-3.10793
Testudo graeca whitei	Spain	37.3694	-1.85329
Testudo graeca whitei	Morocco	33.8717	-3.18438
Testudo graeca whitei	Morocco	33.7778	-3.04128
Testudo graeca whitei	Spain	37.7664	-1.82424
Testudo graeca whitei	Spain	37.494	-1.80637
Testudo graeca whitei	Spain	37.4946	-1.83975
Testudo graeca whitei	Spain	37.5145	-1.85366
Testudo graeca whitei	Spain	37.5014	-1.81582
Testudo graeca whitei	Spain	37.5383	-1.64708
Testudo graeca whitei	Spain	37.5416	-1.85119
Testudo graeca whitei	Spain	37.6201	-1.93806
Testudo graeca whitei	Spain	37.6278	-1.51969
Testudo graeca whitei	Spain	37.6263	-1.95213
Testudo graeca whitei	Algeria	35.87	1.9868
Testudo graeca whitei	Algeria	35.8409	1.96984
Testudo graeca whitei	Algeria	35.8773	1.93938
Testudo graeca whitei	Mallorca	39.5761	2.54335
Testudo graeca zarudnyi	Iran	33.5904	56.9374
Testudo graeca zarudnyi	Iran	29.4442	60.5137
Testudo graeca zarudnyi	Iran	28.8472	60.7115
Testudo graeca zarudnyi	Iran	28.6067	61.0772
Testudo graeca zarudnyi	Iran	28.6086	61.1333
Testudo graeca zarudnyi	Iran	27.2532	60.4475
Testudo hermanni	Croatia	38.1532	21.3851
Testudo hermanni	Greece	38.1236	21.3864
Testudo hermanni	Greece	38.1524	21.3822
Testudo hermanni	Greece	36.8936	22.2291
Testudo hermanni	Greece	38.1866	21.3854
Testudo hermanni	Greece	37.5104	21.6015
Testudo hermanni	Greece	36.9883	21.8554
Testudo hermanni	Greece	38.385	24.1392
Testudo hermanni	Greece	37.9549	23.7799
Testudo hermanni	Greece	37.9614	23.7989
Testudo hermanni	Greece	37.0762	22.3838
Testudo hermanni	Greece	38.1518	20.7337
Testudo hermanni	Greece	36.8845	22.2888
Testudo hermanni	Greece	36.9529	21.6648
Testudo hermanni	Greece	36.8844	22.2928
Testudo hermanni	Corse	41.5708	9.24222
Testudo hermanni	Corse	41.5873	9.25153
Testudo hermanni	Greece	37.0651	22.3595
Testudo hermanni	Greece	37.0698	22.3568
Testudo hermanni	Corse	41.5092	9.19635
Testudo hermanni	Greece	39.3413	20.4371
Testudo hermanni	Albania	39.7459	20.0217
Testudo hermanni	Greece	39.6654	19.793
Testudo hermanni	Greece	39.6753	19.789
Testudo hermanni	Greece	38.1706	20.6251
Testudo hermanni	Sardinia	40.9554	8.2087
Testudo hermanni	Sicily	38.0858	12.8047
Testudo hermanni	Greece	38.6812	22.4343
Testudo hermanni	Corse	41.3802	9.17737
Testudo hermanni	Corse	41.4019	9.21823
Testudo hermanni	Corse	41.3922	9.19462
Testudo hermanni	Corse	41.4062	9.19559
Testudo hermanni	Sardinia	40.7355	8.49512
Testudo hermanni	Sardinia	40.6776	8.22757
Testudo hermanni	Sardinia	40.7611	8.25952
Testudo hermanni	Greece	38.4839	22.4778
Testudo hermanni	Corse	41.4321	9.17065
Testudo hermanni	Spain	39.3273	-0.30353
Testudo hermanni	Greece	37.9128	22.3097
Testudo hermanni	Greece	40.1488	22.5433
Testudo hermanni	Mallorca	39.3653	2.83615
Testudo hermanni	Italy	42.6016	11.1426
Testudo hermanni	Corse	42.2264	9.23081
Testudo hermanni	Italy	42.6566	11.0277
Testudo hermanni	Italy	40.4838	16.938
Testudo hermanni	Sicily	37.9923	14.7153
Testudo hermanni	Albania	39.9105	20.1888
Testudo hermanni	Albania	39.9083	20.1845
Testudo hermanni	Mallorca	39.4573	2.76037
Testudo hermanni	Albania	39.9154	20.1825
Testudo hermanni	Albania	39.9153	20.1823
Testudo hermanni	Albania	39.9078	20.1843
Testudo hermanni	Albania	39.9078	20.1844
Testudo hermanni	Albania	39.9077	20.1841
Testudo hermanni	Albania	39.9066	20.1836
Testudo hermanni	Albania	39.9066	20.1835
Testudo hermanni	Albania	39.9056	20.1846
Testudo hermanni	Albania	39.9035	20.1855
Testudo hermanni	Greece	39.7141	21.6211
Testudo hermanni	Corse	42.3038	9.17226
Testudo hermanni	Mallorca	39.4191	2.80189
Testudo hermanni	Menorca	39.9473	4.26235
Testudo hermanni	Greece	39.7131	21.6268
Testudo hermanni	Greece	39.7134	21.6262
Testudo hermanni	Mallorca	39.3977	2.96274
Testudo hermanni	Greece	39.7303	21.6247
Testudo hermanni	Greece	39.7504	19.8523
Testudo hermanni	Corse	41.884	8.81874
Testudo hermanni	Mallorca	39.3501	3.18406
Testudo hermanni	Menorca	40.0312	4.09752
Testudo hermanni	Mallorca	39.3512	3.18303
Testudo hermanni	Corse	41.911	8.85538
Testudo hermanni	Menorca	39.925	4.02065
Testudo hermanni	Greece	39.7214	21.6461
Testudo hermanni	Greece	39.7172	21.6338
Testudo hermanni	Greece	40.1656	22.3939
Testudo hermanni	Spain	39.9372	3.97242
Testudo hermanni	Albania	40.9651	19.4825
Testudo hermanni	Albania	39.9541	20.1508
Testudo hermanni	Menorca	39.9378	3.93577
Testudo hermanni	Corse	42.2113	9.55568
Testudo hermanni	Albania	40.1491	20.09
Testudo hermanni	Albania	40.2767	20.0362
Testudo hermanni	Albania	40.2766	20.0359
Testudo hermanni	Albania	40.2766	20.0359
Testudo hermanni	Albania	40.2765	20.0364
Testudo hermanni	Albania	40.2764	20.0372
Testudo hermanni	Italy	42.9451	11.4832
Testudo hermanni	Greece	39.4348	19.9358
Testudo hermanni	Greece	39.4355	19.9298
Testudo hermanni	Corse	42.1162	8.81598
Testudo hermanni	Italy	43.1295	10.6616
Testudo hermanni	Greece	39.4873	19.9196
Testudo hermanni	Greece	40.0934	22.4797
Testudo hermanni	Greece	40.0866	22.4782
Testudo hermanni	Mallorca	39.7127	3.26569
Testudo hermanni	Italy	43.3383	10.6644
Testudo hermanni	Mallorca	39.6594	3.2831
Testudo hermanni	Mallorca	39.7267	3.2347
Testudo hermanni	Mallorca	39.7358	3.19814
Testudo hermanni	Mallorca	39.7408	3.18398
Testudo hermanni	Mallorca	39.7497	3.19342
Testudo hermanni	Mallorca	39.7515	3.30877
Testudo hermanni	Spain	39.7262	3.23892
Testudo hermanni	Spain	42.4125	3.06257
Testudo hermanni	Mallorca	39.7429	3.18661
Testudo hermanni	Mallorca	39.7443	3.18605
Testudo hermanni	Mallorca	39.7469	3.1856
Testudo hermanni	Mallorca	39.7482	3.18572
Testudo hermanni	Mallorca	39.7483	3.18583
Testudo hermanni	Mallorca	39.7494	3.17471
Testudo hermanni	Mallorca	39.7543	3.18217
Testudo hermanni	Mallorca	39.7516	3.17465
Testudo hermanni	Mallorca	39.7567	3.16917
Testudo hermanni	Greece	39.8626	20.7966
Testudo hermanni	Greece	39.8617	20.7872
Testudo hermanni	Greece	39.8626	20.778
Testudo hermanni	Croatia	43.7292	15.8374
Testudo hermanni	Greece	39.8778	20.7639
Testudo hermanni	France	43.2286	6.31249
Testudo hermanni	France	43.3278	6.41335
Testudo hermanni	France	43.3525	6.40635
Testudo hermanni	Greece	39.8624	20.8539
Testudo hermanni	France	43.2937	6.49371
Testudo hermanni	Macedonia	40.9112	20.988
Testudo hermanni	Macedonia	40.9105	20.9867
Testudo hermanni	Macedonia	40.8694	20.9893
Testudo hermanni	Croatia	43.914	15.5142
Testudo hermanni	France	43.4725	6.36506
Testudo hermanni	Mallorca	39.9265	3.09104
Testudo hermanni	Macedonia	41.043	20.8053
Testudo hermanni	Macedonia	41.0429	20.8052
Testudo hermanni	Macedonia	41.0428	20.8053
Testudo hermanni	Croatia	43.9308	15.4866
Testudo hermanni	Macedonia	41.1409	20.7636
Testudo hermanni	Croatia	43.944	15.5475
Testudo hermanni	Croatia	43.9424	15.5493
Testudo hermanni	Macedonia	41.0043	20.8094
Testudo hermanni	Croatia	43.9814	15.4456
Testudo hermanni	Croatia	43.9746	15.4567
Testudo hermanni	Croatia	43.9735	15.4532
Testudo hermanni	Croatia	43.9718	15.4503
Testudo hermanni	Bulgaria	43.3756	28.0843
Testudo hermanni	Croatia	43.9645	15.4484
Testudo hermanni	Croatia	43.9527	15.5403
Testudo hermanni	France	43.5197	6.5874
Testudo hermanni	Albania	40.8736	20.6229
Testudo hermanni	Macedonia	41.1069	20.633
Testudo hermanni	Macedonia	41.1033	20.6318
Testudo hermanni	Macedonia	41.0613	20.9783
Testudo hermanni	Albania	41.068	20.6128
Testudo hermanni	Croatia	44.0367	15.3443
Testudo hermanni	Macedonia	41.1347	20.6405
Testudo hermanni	Croatia	44.0068	15.4875
Testudo hermanni	Croatia	44.0049	15.4888
Testudo hermanni	Macedonia	40.9045	21.1704
Testudo hermanni	Bulgaria	41.55	23.4592
Testudo hermanni	Croatia	43.9967	15.5858
Testudo hermanni	Macedonia	41.2121	20.9398
Testudo hermanni	Macedonia	40.9685	20.8105
Testudo hermanni	Montenegro	42.197	18.9657
Testudo hermanni	Montenegro	41.8626	19.3451
Testudo hermanni	Albania	41.1896	20.3081
Testudo hermanni	Croatia	44.1531	15.2427
Testudo hermanni	Montenegro	41.8727	19.3499
Testudo hermanni	Albania	41.8649	19.3967
Testudo hermanni	Albania	41.8585	19.3889
Testudo hermanni	Bulgaria	41.5367	23.5386
Testudo hermanni	Montenegro	44.0428	15.4871
Testudo hermanni	Montenegro	42.2207	18.9085
Testudo hermanni	Montenegro	42.2203	18.9091
Testudo hermanni	Montenegro	42.1802	18.972
Testudo hermanni	Montenegro	41.9021	19.2761
Testudo hermanni	Montenegro	41.902	19.2762
Testudo hermanni	Albania	41.2268	20.3028
Testudo hermanni	Croatia	44.2407	15.1669
Testudo hermanni	Croatia	44.2406	15.1635
Testudo hermanni	Croatia	44.2406	15.1665
Testudo hermanni	Croatia	44.2382	15.1654
Testudo hermanni	Croatia	44.2355	15.162
Testudo hermanni	Croatia	44.2111	15.2341
Testudo hermanni	Macedonia	41.2279	20.2812
Testudo hermanni	Montenegro	42.1876	18.9856
Testudo hermanni	Montenegro	42.187	18.9848
Testudo hermanni	Montenegro	41.9168	19.3392
Testudo hermanni	Montenegro	42.2447	19.0932
Testudo hermanni	Montenegro	42.2433	19.0935
Testudo hermanni	Montenegro	42.2184	19.0749
Testudo hermanni	Montenegro	42.2216	19.0832
Testudo hermanni	Macedonia	41.4694	20.7817
Testudo hermanni	Montenegro	42.2154	18.9339
Testudo hermanni	Montenegro	42.2705	19.1442
Testudo hermanni	Montenegro	42.2235	19.1084
Testudo hermanni	Montenegro	42.2222	19.1106
Testudo hermanni	Montenegro	42.2217	19.1145
Testudo hermanni	Montenegro	42.2074	19.0856
Testudo hermanni	Montenegro	42.4102	18.773
Testudo hermanni	Montenegro	42.4085	18.7708
Testudo hermanni	Albania	41.7076	19.9761
Testudo hermanni	Montenegro	42.4059	18.7667
Testudo hermanni	Montenegro	42.4057	18.7667
Testudo hermanni	Montenegro	42.4041	18.7674
Testudo hermanni	Croatia	44.252	15.5414
Testudo hermanni	Croatia	44.2774	15.4807
Testudo hermanni	Spain	41.2853	1.86978
Testudo hermanni	Albania	41.5146	19.8349
Testudo hermanni	Croatia	44.3288	15.376
Testudo hermanni	Montenegro	42.3728	18.9545
Testudo hermanni	Montenegro	44.2953	15.459
Testudo hermanni	Croatia	44.2926	15.457
Testudo hermanni	Kosovo	42.5127	20.9801
Testudo hermanni	Albania	42.3568	20.0922
Testudo hermanni	Kosovo	42.5254	20.5884
Testudo hermanni	Croatia	44.1938	15.8533
Testudo hermanni	Kosovo	42.6792	21.1933
Testudo hermanni	Kosovo	42.676	21.2074
Testudo hermanni	Croatia	44.2388	15.6687
Testudo hermanni	Romania	45.6531	21.285
Testudo hermanni	Croatia	45.0823	14.5521
Testudo hermanni	Croatia	45.3523	13.6614
Testudo hermanni	Croatia	45.0951	14.3532
Testudo hermanni	Croatia	45.1036	14.3418
Testudo hermanni	Croatia	45.1118	14.3358
Testudo hermanni	Croatia	45.1348	14.3496
Testudo hermanni	Croatia	45.126	14.33
Testudo hermanni	Bosnia	44.3654	16.3725
Testudo hermanni	Croatia	45.1067	14.3394
Testudo hermanni	Croatia	45.1062	14.3392
Testudo horsfieldii	Iran	36.0932	60.654
Testudo horsfieldii	Iran	36.5809	60.7605
Testudo horsfieldii	Uzbekistan	38.75	65.1333
Testudo horsfieldii	Uzbekistan	38.7167	65.0333
Testudo horsfieldii	Iran	32.6708	59.7977
Testudo horsfieldii	Iran	32.645	59.7735
Testudo horsfieldii	Uzbekistan	39.5783	64.6881
Testudo horsfieldii	Uzbekistan	39.4	65.6667
Testudo horsfieldii	Uzbekistan	41.05	64.4167
Testudo horsfieldii	Uzbekistan	40.7167	63.2
Testudo horsfieldii	Uzbekistan	40.55	65.0167
Testudo horsfieldii	Uzbekistan	37.75	66.9167
Testudo horsfieldii	Uzbekistan	40.6612	64.4475
Testudo horsfieldii	Uzbekistan	40.7224	64.8715
Testudo horsfieldii	Uzbekistan	40.723	64.8705
Testudo horsfieldii	Iran	35.6773	56.6381
Testudo horsfieldii	Pakistan	29.7111	65.8539
Testudo horsfieldii	Uzbekistan	40.0667	65.3
Testudo horsfieldii	Uzbekistan	39.6333	65.8833
Testudo horsfieldii	Uzbekistan	39.5667	66.0333
Testudo horsfieldii	Uzbekistan	39.5	66.1333
Testudo horsfieldii	Uzbekistan	40.5296	65.1719
Testudo horsfieldii	Uzbekistan	40.6069	65.2784
Testudo horsfieldii	Iran	35.8611	56.0427
Testudo horsfieldii	Uzbekistan	40.8333	58.6667
Testudo horsfieldii	Uzbekistan	41.4017	65.7949
Testudo horsfieldii	Uzbekistan	42.0833	63.5333
Testudo horsfieldii	Uzbekistan	42.0352	63.0991
Testudo horsfieldii	Uzbekistan	41.9833	63.55
Testudo horsfieldii	Uzbekistan	41.5314	64.0318
Testudo horsfieldii	Uzbekistan	41.7367	63.3207
Testudo horsfieldii	Uzbekistan	42.3667	59.7
Testudo horsfieldii	Uzbekistan	38.0667	67.0833
Testudo horsfieldii	Uzbekistan	41.3193	65.0903
Testudo horsfieldii	Uzbekistan	41.3949	63.1802
Testudo horsfieldii	Uzbekistan	41.4017	63.2404
Testudo horsfieldii	Uzbekistan	43.25	61.05
Testudo horsfieldii	Uzbekistan	42.3833	63.5
Testudo horsfieldii	Uzbekistan	42.3333	63.85
Testudo horsfieldii	Uzbekistan	41.2167	66.3833
Testudo horsfieldii	Uzbekistan	40.7833	66.9167
Testudo horsfieldii	Uzbekistan	39.6712	67.0894
Testudo horsfieldii	Uzbekistan	40.7379	66.0672
Testudo horsfieldii	Uzbekistan	41.5167	64.3
Testudo horsfieldii	Uzbekistan	39.3	66.6667
Testudo horsfieldii	Uzbekistan	42.6919	63.4258
Testudo horsfieldii	Uzbekistan	42.6165	63.4002
Testudo horsfieldii	Uzbekistan	43.4833	56.9334
Testudo horsfieldii	Uzbekistan	43.6667	58.2333
Testudo horsfieldii	Uzbekistan	42.8167	57.7833
Testudo horsfieldii	Uzbekistan	43.32	58.1618
Testudo horsfieldii	Uzbekistan	43.9667	57.35
Testudo horsfieldii	Uzbekistan	43.75	57.8667
Testudo horsfieldii	Uzbekistan	40.45	66.3667
Testudo horsfieldii	Uzbekistan	43.5002	58.1668
Testudo horsfieldii	Uzbekistan	44.0667	57.65
Testudo horsfieldii	Uzbekistan	44.0833	57.2667
Testudo horsfieldii	Uzbekistan	43.883	56.2833
Testudo horsfieldii	Uzbekistan	39.892	68.5
Testudo horsfieldii	Pakistan	29.7946	66.9015
Testudo horsfieldii	Kazakhstan	45.6605	59.8998
Testudo horsfieldii	Uzbekistan	44.6163	58.2833
Testudo horsfieldii	Uzbekistan	44.45	57.7333
Testudo horsfieldii	Uzbekistan	45.0833	58.3
Testudo horsfieldii	Uzbekistan	44.9667	56.5667
Testudo horsfieldii	Uzbekistan	44.95	56.7167
Testudo horsfieldii	Pakistan	30.047	66.8824
Testudo horsfieldii	Pakistan	30.0499	66.8812
Testudo horsfieldii	Uzbekistan	45.0828	57.4831
Testudo horsfieldii	Uzbekistan	44.983	56.25
Testudo horsfieldii	Uzbekistan	44.95	56.85
Testudo horsfieldii	Uzbekistan	44.8667	56.3
Testudo horsfieldii	Uzbekistan	44.9975	56.9133
Testudo horsfieldii	Pakistan	30.0506	66.8997
Testudo horsfieldii	Kazakhstan	45.7147	73.4051
Testudo horsfieldii	Kazakhstan	45.4012	73.6382
Testudo horsfieldii	Kazakhstan	44.8369	74.2129
Testudo horsfieldii	Kazakhstan	43.9596	73.5865
Testudo horsfieldii	Pakistan	28.5042	66.287
Testudo horsfieldii	Pakistan	30.442	67.4338
Testudo horsfieldii	Iran	36.9093	54.0058
Testudo horsfieldii	Afghanistan	31.9498	68.8266
Testudo horsfieldii	Pakistan	30.3734	66.9752
Testudo horsfieldii	Pakistan	31.1981	68.456
Testudo horsfieldii	Kazakhstan	44.5044	75.0616
Testudo kleinmanni	Israel	31.0127	34.5015
Testudo kleinmanni	Israel	30.9486	34.4978
Testudo kleinmanni	Israel	31.0226	34.4973
Testudo kleinmanni	Israel	30.8991	34.4838
Testudo kleinmanni	Israel	30.9935	34.4504
Testudo kleinmanni	Israel	31.045	35.1213
Testudo kleinmanni	Israel	31.025	34.4501
Testudo kleinmanni	Egypt	31.1235	33.4833
Testudo marginata	Greece	37.7182	26.9413
Testudo marginata	Greece	36.8226	21.7126
Testudo marginata	Greece	36.4763	22.4162
Testudo marginata	Greece	37.6507	24.025
Testudo marginata	Greece	37.6674	24.0344
Testudo marginata	Greece	38.0279	24.2842
Testudo marginata	Greece	37.6909	23.9479
Testudo marginata	Greece	37.9256	24.0003
Testudo marginata	Greece	36.4777	22.9656
Testudo marginata	Greece	37.2234	23.1673
Testudo marginata	Greece	38.1381	24.0182
Testudo marginata	Greece	38.1445	24.0447
Testudo marginata	Greece	38.156	21.4057
Testudo marginata	Greece	38.1578	21.4001
Testudo marginata	Greece	37.5153	23.4846
Testudo marginata	Greece	38.1909	21.3724
Testudo marginata	Greece	38.3025	24.112
Testudo marginata	Greece	37.2566	23.141
Testudo marginata	Greece	37.3313	23.3113
Testudo marginata	Greece	37.9881	23.7389
Testudo marginata	Greece	38.1622	21.39
Testudo marginata	Greece	38.3849	24.1462
Testudo marginata	Greece	38.8081	24.4881
Testudo marginata	Greece	36.9068	22.2443
Testudo marginata	Greece	38.0098	23.6457
Testudo marginata	Greece	38.175	21.3749
Testudo marginata	Greece	37.9562	23.7829
Testudo marginata	Greece	38.3069	21.4752
Testudo marginata	Greece	37.51	22.8624
Testudo marginata	Greece	37.9616	23.7951
Testudo marginata	Greece	38.0211	23.8849
Testudo marginata	Greece	37.4359	22.9823
Testudo marginata	Greece	37.9982	23.6259
Testudo marginata	Greece	38.454	23.6797
Testudo marginata	Greece	37.4726	23.1643
Testudo marginata	Greece	37.9995	23.6099
Testudo marginata	Greece	38.4764	23.9871
Testudo marginata	Greece	38.2299	23.7867
Testudo marginata	Greece	36.7448	22.3561
Testudo marginata	Greece	37.0727	22.3691
Testudo marginata	Greece	37.9598	23.814
Testudo marginata	Greece	38.7663	23.5137
Testudo marginata	Greece	37.6072	22.8802
Testudo marginata	Greece	38.1373	23.7343
Testudo marginata	Greece	38.3655	22.072
Testudo marginata	Greece	38.4846	23.1846
Testudo marginata	Greece	37.0784	22.3646
Testudo marginata	Greece	39.3262	24.0742
Testudo marginata	Greece	36.7694	21.7036
Testudo marginata	Greece	36.9187	21.6685
Testudo marginata	Greece	36.9529	21.6634
Testudo marginata	Greece	38.3739	22.3874
Testudo marginata	Greece	38.9737	23.186
Testudo marginata	Greece	37.0412	22.203
Testudo marginata	Greece	37.0186	22.1789
Testudo marginata	Sardinia	40.9057	9.51717
Testudo marginata	Greece	38.8572	22.8711
Testudo marginata	Greece	38.429	22.864
Testudo marginata	Greece	38.4291	22.8642
Testudo marginata	Greece	37.2569	22.7833
Testudo marginata	Greece	39.2978	20.4706
Testudo marginata	Greece	38.426	22.884
Testudo marginata	Greece	38.4261	22.8844
Testudo marginata	Greece	38.4268	22.8876
Testudo marginata	Greece	37.0676	22.3422
Testudo marginata	Greece	38.1641	23.7528
Testudo marginata	Greece	38.4519	21.3994
Testudo marginata	Sardinia	41.1749	9.39478
Testudo marginata	Greece	38.1737	23.7433
Testudo marginata	Greece	38.1793	23.7365
Testudo marginata	Greece	38.1806	23.7344
Testudo marginata	Sardinia	41.1728	9.4154
Testudo marginata	Sardinia	41.0941	9.3948
Testudo marginata	Sardinia	41.1238	9.27584
Testudo marginata	Sardinia	41.1923	9.28997
Testudo marginata	Sardinia	41.2182	9.47175
Testudo marginata	Greece	37.0178	22.3542
Testudo marginata	Greece	40.9862	9.4439
Testudo marginata	Sardinia	40.9862	9.44349
Testudo marginata	Sardinia	40.9863	9.444
Testudo marginata	Sardinia	40.9863	9.44397
Testudo marginata	Sardinia	40.9864	9.44359
Testudo marginata	Sardinia	40.9878	9.44581
Testudo marginata	Sardinia	41.238	9.15144
Testudo marginata	Sardinia	41.2384	9.14287
Testudo marginata	Sardinia	41.2416	9.15027
Testudo marginata	Greece	38.4827	22.5002
Testudo marginata	Sardinia	41.0694	9.3245
Testudo marginata	Sardinia	41.2438	9.14479
Testudo marginata	Greece	38.4829	22.496
Testudo marginata	Greece	37.5628	22.4008
Testudo marginata	Greece	38.6116	22.5137
Testudo marginata	Greece	37.5395	22.3072
Testudo marginata	Greece	38.5907	23.9165
Testudo marginata	Greece	37.9428	22.1634
Testudo marginata	Greece	37.6244	22.2841
Testudo marginata	Albania	39.9066	20.1834
Testudo marginata	Albania	39.9066	20.1834
Testudo marginata	Albania	39.9068	20.1839
Testudo marginata	Albania	39.9072	20.189
Testudo marginata	Albania	39.908	20.1847
Testudo marginata	Greece	40.6901	23.4717
Testudo marginata	Greece	39.2818	20.4115
Testudo marginata	Albania	39.9066	20.1833
Testudo marginata	Greece	39.9496	20.7078
THINNED 10K RECORDS
Taxa	Longitude	Latitude
T. g. armeniaca	44.5	40.4
T. g. armeniaca	44.7	39.9
T. g. armeniaca	46.3	38.9
T. g. armeniaca	49.5	40.8
T. g. armeniaca	47.2	39.7
T. g. armeniaca	46.9	39.2
T. g. armeniaca	44.9	38.8
T. g. armeniaca	47.2	43
T. g. buxtoni	48	38.9
T. g. buxtoni	45.6	38.9
T. g. buxtoni	46.9	38.8
T. g. buxtoni	46.9	38.4
T. g. buxtoni	47.9	38.4
T. g. buxtoni	47.4	38.3
T. g. buxtoni	45.5	38.2
T. g. buxtoni	46.2	37.5
T. g. buxtoni	45.3	37.3
T. g. buxtoni	48.1	37.2
T. g. buxtoni	49.4	36.7
T. g. buxtoni	48.3	36.7
T. g. buxtoni	49.3	36.6
T. g. buxtoni	47	35.9
T. g. buxtoni	46.6	34.8
T. g. buxtoni	47.2	34.8
T. g. buxtoni	47.5	34.6
T. g. buxtoni	46.9	34.6
T. g. buxtoni	46.3	34.3
T. g. buxtoni	46.8	34.3
T. g. buxtoni	46.6	33.7
T. g. buxtoni	49.9	33.7
T. g. buxtoni	52.6	32.9
T. g. buxtoni	52.4	32.8
T. g. buxtoni	50.4	32.4
T. g. buxtoni	52	30.2
T. g. buxtoni	53.3	29.9
T. g. buxtoni	53.2	30.3
T. g. buxtoni	54.1	31.5
T. g. buxtoni	54.4	32.5
T. g. buxtoni	55.2	32.6
T. g. cyrenaica	21.8	32.7
T. g. cyrenaica	21.5	32.6
T. g. cyrenaica	21.1	32.3
T. g. graeca	-10	29.4
T. g. graeca	-9.4	29.6
T. g. graeca	-9.8	29.7
T. g. graeca	-9.8	29.9
T. g. graeca	-9.5	29.9
T. g. graeca	-9.2	30
T. g. graeca	-9.7	30.1
T. g. graeca	-9.6	30.3
T. g. graeca	-9.6	30.4
T. g. graeca	-9.1	30.4
T. g. graeca	-8.7	30.4
T. g. graeca	-9	30.4
T. g. graeca	-8.5	30.5
T. g. graeca	-8.7	30.5
T. g. graeca	-8.1	30.6
T. g. graeca	-8.4	30.8
T. g. graeca	-9.8	30.8
T. g. graeca	-9.7	31.2
T. g. graeca	-8	31.3
T. g. graeca	-9.8	31.3
T. g. graeca	-7.8	31.4
T. g. graeca	-7.4	31.4
T. g. graeca	-7.6	31.5
T. g. graeca	-7.7	31.6
T. g. graeca	-9.3	31.6
T. g. graeca	-7.3	31.7
T. g. graeca	-7	31.7
T. g. graeca	-8	31.8
T. g. graeca	-7.9	31.9
T. g. graeca	-9.4	31.9
T. g. graeca	-9.6	31.5
T. g. ibera	28.2	45.2
T. g. ibera	28.6	45.2
T. g. ibera	28.4	45.2
T. g. ibera	28.8	44.9
T. g. ibera	28.7	44.8
T. g. ibera	37.6	44.7
T. g. ibera	28.8	44.6
T. g. ibera	28.8	44.4
T. g. ibera	28	44.3
T. g. ibera	27.8	44.1
T. g. ibera	28.6	44.1
T. g. ibera	27.6	44.1
T. g. ibera	28.4	43.8
T. g. ibera	28.1	43.7
T. g. ibera	28.5	43.4
T. g. ibera	21.9	42.3
T. g. ibera	21.7	42.3
T. g. ibera	21.3	42.1
T. g. ibera	44.7	41.8
T. g. ibera	44.8	41.7
T. g. ibera	46.1	41.5
T. g. ibera	45.2	41.5
T. g. ibera	45.4	41.4
T. g. ibera	44.5	41.4
T. g. ibera	46.3	41.3
T. g. ibera	46	41.3
T. g. ibera	45.8	41.3
T. g. ibera	46.4	41.2
T. g. ibera	46.5	41.2
T. g. ibera	45.4	40.9
T. g. ibera	25.7	40.5
T. g. ibera	32.6	40.4
T. g. ibera	22.9	40.4
T. g. ibera	26.3	39.4
T. g. ibera	26.2	39.3
T. g. ibera	26	39.3
T. g. ibera	26.3	39.3
T. g. ibera	26.1	39.3
T. g. ibera	25.9	39.2
T. g. ibera	26	39.2
T. g. ibera	26.3	39.2
T. g. ibera	26.4	39.1
T. g. ibera	26.2	39.1
T. g. ibera	26.5	39
T. g. ibera	26.4	39
T. g. ibera	26.8	38.7
T. g. ibera	26.7	38.4
T. g. ibera	27.3	37.9
T. g. ibera	27.4	37.9
T. g. ibera	26.9	37.7
T. g. ibera	27.2	37.7
T. g. ibera	27.5	37.6
T. g. ibera	28.2	37.5
T. g. ibera	27.3	37.5
T. g. ibera	23.5	37.5
T. g. ibera	27.5	37.5
T. g. ibera	27.8	37.4
T. g. ibera	23.1	37.3
T. g. ibera	27.3	37.1
T. g. ibera	27.5	37
T. g. ibera	27.3	36.8
T. g. ibera	27.2	36.8
T. g. ibera	27.1	36.8
T. g. ibera	28.1	36.7
T. g. ibera	27.8	36.6
T. g. ibera	35.1	38.3
T. g. ibera	39	40.1
T. g. marokkensis	-6	32.6
T. g. marokkensis	-7.2	33.1
T. g. marokkensis	-7.6	33.5
T. g. marokkensis	-6	33.5
T. g. marokkensis	-5.6	33.6
T. g. marokkensis	-5.3	33.6
T. g. marokkensis	-7.1	33.6
T. g. marokkensis	-5	33.7
T. g. marokkensis	-6.2	33.7
T. g. marokkensis	-6.9	33.7
T. g. marokkensis	-6.5	33.7
T. g. marokkensis	-5.6	33.8
T. g. marokkensis	-6.6	33.9
T. g. marokkensis	-4.9	34
T. g. marokkensis	-6.6	34
T. g. marokkensis	-5.3	34.1
T. g. marokkensis	-4.1	34.1
T. g. marokkensis	-5	34.1
T. g. marokkensis	-4.3	34.1
T. g. marokkensis	-6.6	34.2
T. g. marokkensis	-6.7	34.2
T. g. marokkensis	-6.1	34.3
T. g. marokkensis	-6.4	34.4
T. g. marokkensis	-5.7	34.7
T. g. marokkensis	-5.5	34.8
T. g. marokkensis	-6.1	34.9
T. g. marokkensis	-6.3	34.9
T. g. marokkensis	-5.8	34.9
T. g. marokkensis	-5.4	35.3
T. g. marokkensis	-5.4	35.5
T. g. marokkensis	-5.8	35.5
T. g. marokkensis	-6	35.6
T. g. marokkensis	-5.4	35.9
T. g. nabeulensis	8.1	33.9
T. g. nabeulensis	9.4	34.5
T. g. nabeulensis	8.6	35.2
T. g. nabeulensis	11.1	35.3
T. g. nabeulensis	10.5	35.7
T. g. nabeulensis	10.5	35.9
T. g. nabeulensis	10.4	36.4
T. g. nabeulensis	9.2	36.4
T. g. nabeulensis	10.3	36.6
T. g. nabeulensis	10.3	36.7
T. g. nabeulensis	8.6	36.8
T. g. nabeulensis	11	37.1
T. g. nabeulensis	9.4	37.2
T. g. nabeulensis	9.5	37.2
T. g. nabeulensis	8.9	37.5
T. g. nabeulensis	9.5	39.1
T. g. nabeulensis	8.4	39.9
T. g. nabeulensis	8.3	40
T. g. nabeulensis	8.5	40.1
T. g. terrestris	34.9	31.7
T. g. terrestris	35	31.7
T. g. terrestris	35.2	31.7
T. g. terrestris	35.1	31.8
T. g. terrestris	35.4	32
T. g. terrestris	35	32.6
T. g. terrestris	35.5	32.6
T. g. terrestris	35.1	32.7
T. g. terrestris	35.5	32.9
T. g. terrestris	35.1	32.9
T. g. terrestris	35.7	32.9
T. g. terrestris	35.3	33
T. g. terrestris	35.5	33
T. g. terrestris	35.2	33.1
T. g. terrestris	35.5	33.1
T. g. terrestris	35.6	33.2
T. g. terrestris	35.8	33.3
T. g. terrestris	35.7	34.2
T. g. terrestris	36.6	35.9
T. g. terrestris	32.8	36
T. g. terrestris	33.7	36.2
T. g. terrestris	29.7	36.2
T. g. terrestris	29.4	36.2
T. g. terrestris	34	36.4
T. g. terrestris	30.5	36.4
T. g. terrestris	29.3	36.5
T. g. terrestris	34.1	36.5
T. g. terrestris	30.6	36.5
T. g. terrestris	32	36.5
T. g. terrestris	29.1	36.6
T. g. terrestris	34.2	36.6
T. g. terrestris	33.9	36.6
T. g. terrestris	35.1	36.7
T. g. terrestris	31.6	36.7
T. g. terrestris	29.2	36.7
T. g. terrestris	28.6	36.8
T. g. terrestris	33.4	36.8
T. g. terrestris	31.5	36.8
T. g. terrestris	30.8	36.9
T. g. terrestris	28.7	36.9
T. g. terrestris	28.6	36.9
T. g. terrestris	31.5	36.9
T. g. terrestris	31.2	36.9
T. g. terrestris	28.6	37
T. g. terrestris	31.9	37
T. g. terrestris	28.3	37.1
T. g. terrestris	37.2	37.1
T. g. terrestris	32.1	37.2
T. g. terrestris	31.5	37.6
T. g. terrestris	42.3	38.7
T. g. terrestris	43.5	38.7
T. g. terrestris	42.5	38.7
T. g. terrestris	43.5	38.9
T. g. terrestris	43	38.9
T. g. terrestris	43.7	38.9
T. g. whitei	-2.8	33.4
T. g. whitei	-3.1	33.6
T. g. whitei	-3	33.8
T. g. whitei	-3.2	33.9
T. g. whitei	-2.6	34
T. g. whitei	-2.4	34.8
T. g. whitei	-2.4	34.9
T. g. whitei	-2.7	34.9
T. g. whitei	-3.8	35.1
T. g. whitei	-2.4	35.1
T. g. whitei	-3	35.3
T. g. whitei	-0.1	35.7
T. g. whitei	2	35.9
T. g. whitei	1.4	36.3
T. g. whitei	-6.4	37
T. g. whitei	-1.9	37.2
T. g. whitei	-1.8	37.4
T. g. whitei	-1.9	37.5
T. g. whitei	-1.6	37.5
T. g. whitei	-1.9	37.6
T. g. whitei	-1.5	37.6
T. g. whitei	-1.8	37.8
T. g. whitei	2.5	39.6
T. g. zarudnyi	56.9	33.6
T. g. zarudnyi	60.4	27.3
T. g. zarudnyi	60.5	29.4
T. g. zarudnyi	60.7	28.8
T. hermanni	20.1	42.4
T. hermanni	19.4	41.9
T. hermanni	20	41.7
T. hermanni	19.8	41.5
T. hermanni	20.3	41.2
T. hermanni	19.5	41
T. hermanni	20.6	40.9
T. hermanni	20	40.3
T. hermanni	20.1	40.1
T. hermanni	20.2	40
T. hermanni	20	39.7
T. hermanni	16.4	44.4
T. hermanni	13.7	45.4
T. hermanni	14.4	45.1
T. hermanni	14.6	45.1
T. hermanni	15.4	44.3
T. hermanni	15.5	44.3
T. hermanni	15.2	44.2
T. hermanni	15.7	44.2
T. hermanni	15.9	44.2
T. hermanni	15.2	44.2
T. hermanni	15.3	44
T. hermanni	15.6	44
T. hermanni	15.5	43.9
T. hermanni	15.8	43.7
T. hermanni	21.4	38.2
T. hermanni	23.8	38
T. hermanni	22.5	40.1
T. hermanni	22.5	38.5
T. hermanni	22.4	38.7
T. hermanni	22.4	40.2
T. hermanni	22.4	37.1
T. hermanni	21.9	37
T. hermanni	21.7	37
T. hermanni	21.6	39.7
T. hermanni	21.6	37.5
T. hermanni	21.2	38.3
T. hermanni	20.8	39.9
T. hermanni	20.6	38.2
T. hermanni	19.9	39.4
T. hermanni	19.9	39.8
T. hermanni	19.8	39.7
T. hermanni	20.4	39.3
T. hermanni	22.3	36.9
T. hermanni	22.3	37.9
T. hermanni	24.1	38.4
T. hermanni	23.5	41.5
T. hermanni	28.1	43.4
T. hermanni	21.3	45.7
T. hermanni	21.2	42.7
T. hermanni	20.6	42.5
T. hermanni	21	42.5
T. hermanni	20.8	41.5
T. hermanni	20.9	41.2
T. hermanni	20.8	41.1
T. hermanni	20.6	41.1
T. hermanni	21	41.1
T. hermanni	20.8	41
T. hermanni	21	40.9
T. hermanni	21.2	40.9
T. hermanni	18.8	42.4
T. hermanni	19	42.4
T. hermanni	19.1	42.3
T. hermanni	19	42.2
T. hermanni	19.3	41.9
T. hermanni	9.2	41.4
T. hermanni	9.3	41.6
T. hermanni	8.9	41.7
T. hermanni	8.9	41.9
T. hermanni	8.8	42.1
T. hermanni	9.6	42.2
T. hermanni	9.2	42.2
T. hermanni	6.3	43.2
T. hermanni	6.4	43.3
T. hermanni	6.4	43.5
T. hermanni	6.6	43.5
T. hermanni	16.9	40.5
T. hermanni	11.1	42.6
T. hermanni	11	42.7
T. hermanni	11.5	42.9
T. hermanni	10.7	43.1
T. hermanni	10.7	43.3
T. hermanni	3.1	39.3
T. hermanni	3.2	39.4
T. hermanni	2.8	39.4
T. hermanni	3	39.4
T. hermanni	2.7	39.5
T. hermanni	3.3	39.7
T. hermanni	3.2	39.7
T. hermanni	3.3	39.8
T. hermanni	3.1	39.9
T. hermanni	4.1	40
T. hermanni	4.3	39.9
T. hermanni	8.2	40.7
T. hermanni	8.5	40.7
T. hermanni	8.2	41
T. hermanni	14.7	38
T. hermanni	12.8	38.1
T. hermanni	-0.3	39.3
T. hermanni	4	39.9
T. hermanni	1.9	41.3
T. hermanni	3.1	42.4
T. hermanni	0.7	40.6
T. horsfieldii	68.8	31.9
T. horsfieldii	59.8	32.7
T. horsfieldii	67.4	30.4
T. horsfieldii	66.9	29.8
T. horsfieldii	65.9	29.7
T. horsfieldii	66.3	28.5
T. horsfieldii	66.9	30
T. horsfieldii	67	30.4
T. horsfieldii	68.5	31.2
T. horsfieldii	73.6	44
T. horsfieldii	75.1	44.5
T. horsfieldii	74.2	44.8
T. horsfieldii	73.4	45.7
T. horsfieldii	73.6	45.4
T. horsfieldii	59.9	45.7
T. horsfieldii	58.3	45.1
T. horsfieldii	57.5	45.1
T. horsfieldii	56.2	45
T. horsfieldii	56.6	45
T. horsfieldii	56.7	45
T. horsfieldii	56.3	44.9
T. horsfieldii	58.3	44.6
T. horsfieldii	57.7	44.5
T. horsfieldii	57.3	44.1
T. horsfieldii	57.7	44.1
T. horsfieldii	57.3	44
T. horsfieldii	56.3	43.9
T. horsfieldii	57.9	43.8
T. horsfieldii	58.2	43.7
T. horsfieldii	56.9	43.5
T. horsfieldii	61.1	43.3
T. horsfieldii	57.8	42.8
T. horsfieldii	63.4	42.6
T. horsfieldii	63.5	42.4
T. horsfieldii	59.7	42.4
T. horsfieldii	63.9	42.3
T. horsfieldii	63.5	42.1
T. horsfieldii	63.1	42
T. horsfieldii	63.6	42
T. horsfieldii	64.3	41.5
T. horsfieldii	66.4	41.2
T. horsfieldii	64.4	41.1
T. horsfieldii	58.7	40.8
T. horsfieldii	66.9	40.8
T. horsfieldii	63.2	40.7
T. horsfieldii	65	40.5
T. horsfieldii	66.4	40.4
T. horsfieldii	65.3	40.1
T. horsfieldii	65.9	39.6
T. horsfieldii	66	39.6
T. horsfieldii	66.1	39.5
T. horsfieldii	65.7	39.4
T. horsfieldii	66.7	39.3
T. horsfieldii	65	38.7
T. horsfieldii	67.1	38.1
T. horsfieldii	66.9	37.8
T. horsfieldii	64.7	39.6
T. horsfieldii	67.1	39.7
T. horsfieldii	68.5	39.9
T. horsfieldii	65.2	40.5
T. horsfieldii	65.3	40.6
T. horsfieldii	64.4	40.7
T. horsfieldii	64.9	40.7
T. horsfieldii	66.1	40.7
T. horsfieldii	65.1	41.3
T. horsfieldii	63.2	41.4
T. horsfieldii	65.8	41.4
T. horsfieldii	64	41.5
T. horsfieldii	63.3	41.7
T. horsfieldii	58.2	43.3
T. horsfieldii	58.2	43.5
T. horsfieldii	56.9	45
T. horsfieldii	56	35.9
T. horsfieldii	56.6	35.7
T. horsfieldii	60.7	36.1
T. horsfieldii	60.8	36.6
T. horsfieldii	54	36.9
T. kleinmanni	34.5	30.9
T. kleinmanni	35.1	31
T. kleinmanni	34.5	31
T. kleinmanni	33.5	31.1
T. marginata	22.4	36.5
T. marginata	23	36.5
T. marginata	22.4	36.7
T. marginata	21.7	36.8
T. marginata	22.2	36.9
T. marginata	21.7	37
T. marginata	22.4	37
T. marginata	22.2	37
T. marginata	23.1	37.3
T. marginata	22.8	37.3
T. marginata	23.3	37.3
T. marginata	22.8	37.4
T. marginata	23	37.4
T. marginata	23.2	37.5
T. marginata	22.9	37.5
T. marginata	23.5	37.5
T. marginata	22.4	37.6
T. marginata	22.9	37.6
T. marginata	22.3	37.6
T. marginata	24	37.7
T. marginata	26.9	37.7
T. marginata	21.3	37.8
T. marginata	24	37.9
T. marginata	22.2	37.9
T. marginata	23.8	38
T. marginata	23.6	38
T. marginata	23.9	38
T. marginata	24.3	38
T. marginata	23.7	38.1
T. marginata	24	38.1
T. marginata	21.4	38.2
T. marginata	23.8	38.2
T. marginata	21.5	38.3
T. marginata	22.1	38.4
T. marginata	22.4	38.4
T. marginata	24.1	38.4
T. marginata	22.9	38.4
T. marginata	21.4	38.5
T. marginata	23.7	38.5
T. marginata	24	38.5
T. marginata	22.5	38.5
T. marginata	23.2	38.5
T. marginata	23.9	38.6
T. marginata	22.5	38.6
T. marginata	24.6	38.7
T. marginata	23.5	38.8
T. marginata	24.5	38.8
T. marginata	22.9	38.9
T. marginata	23.2	39
T. marginata	20.4	39.3
T. marginata	24.1	39.3
T. marginata	20.2	39.9
T. marginata	20.7	39.9
T. marginata	23.5	40.7
T. marginata	9.5	40.9
T. marginata	9.4	41
T. marginata	9.4	41.1
T. marginata	9.1	41.1
T. marginata	9.3	41.2
T. marginata	9.5	41.2
T. marginata	9.1	41.2
